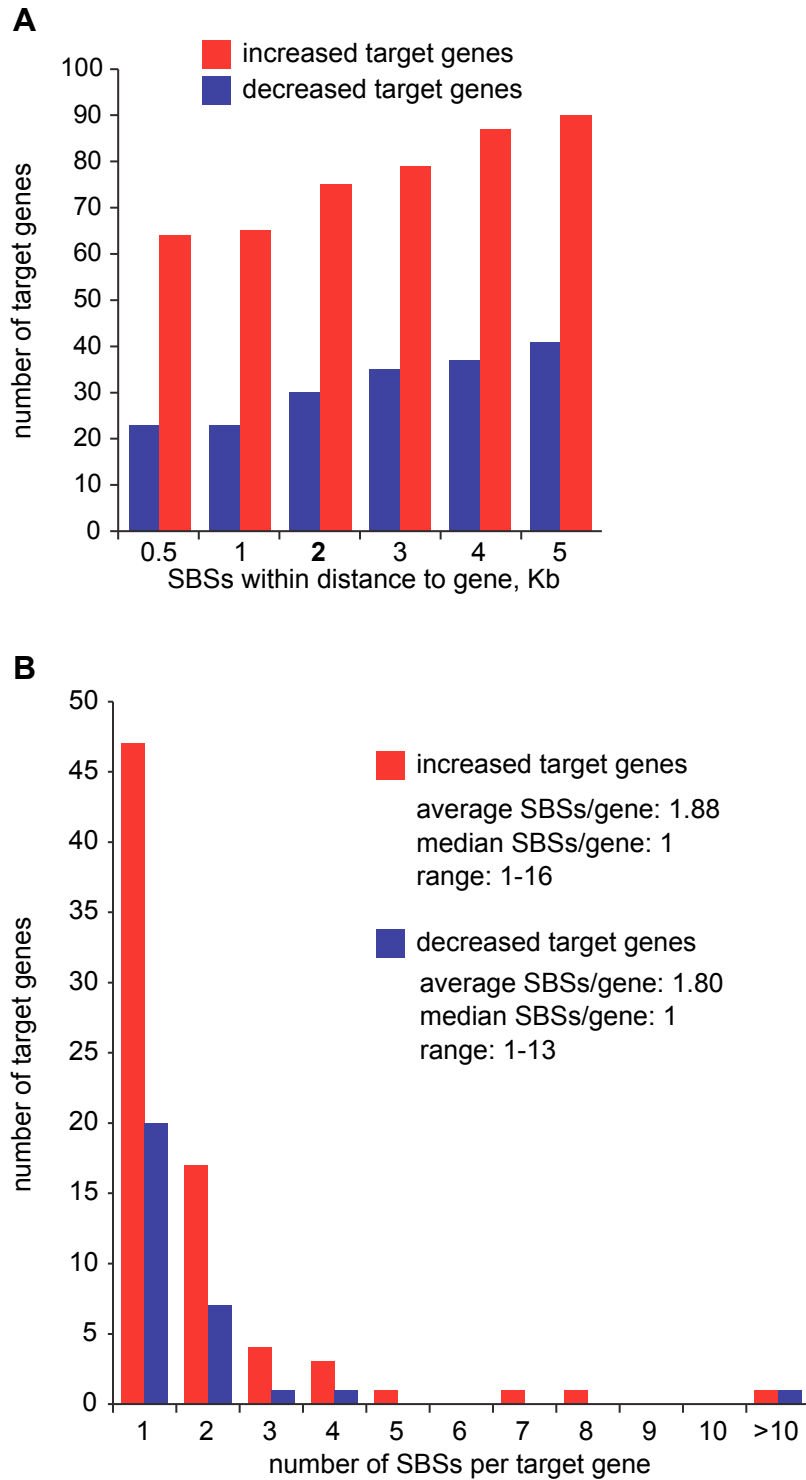

**Fig. S1. Distribution of SBSs relative to the genes identified in microarray analyses.** (A) Numbers of genes classified as direct targets, considering the presence of an SBS at different distance cutoffs of regulatory DNA flanking the mis-regulated gene (0.5 to 5 Kb). Activated and repressed genes are shown in red and blue, respectively. (B) Numbers of SBSs per target gene, with average, median and range indicated for activated (red) and repressed (blue) genes.

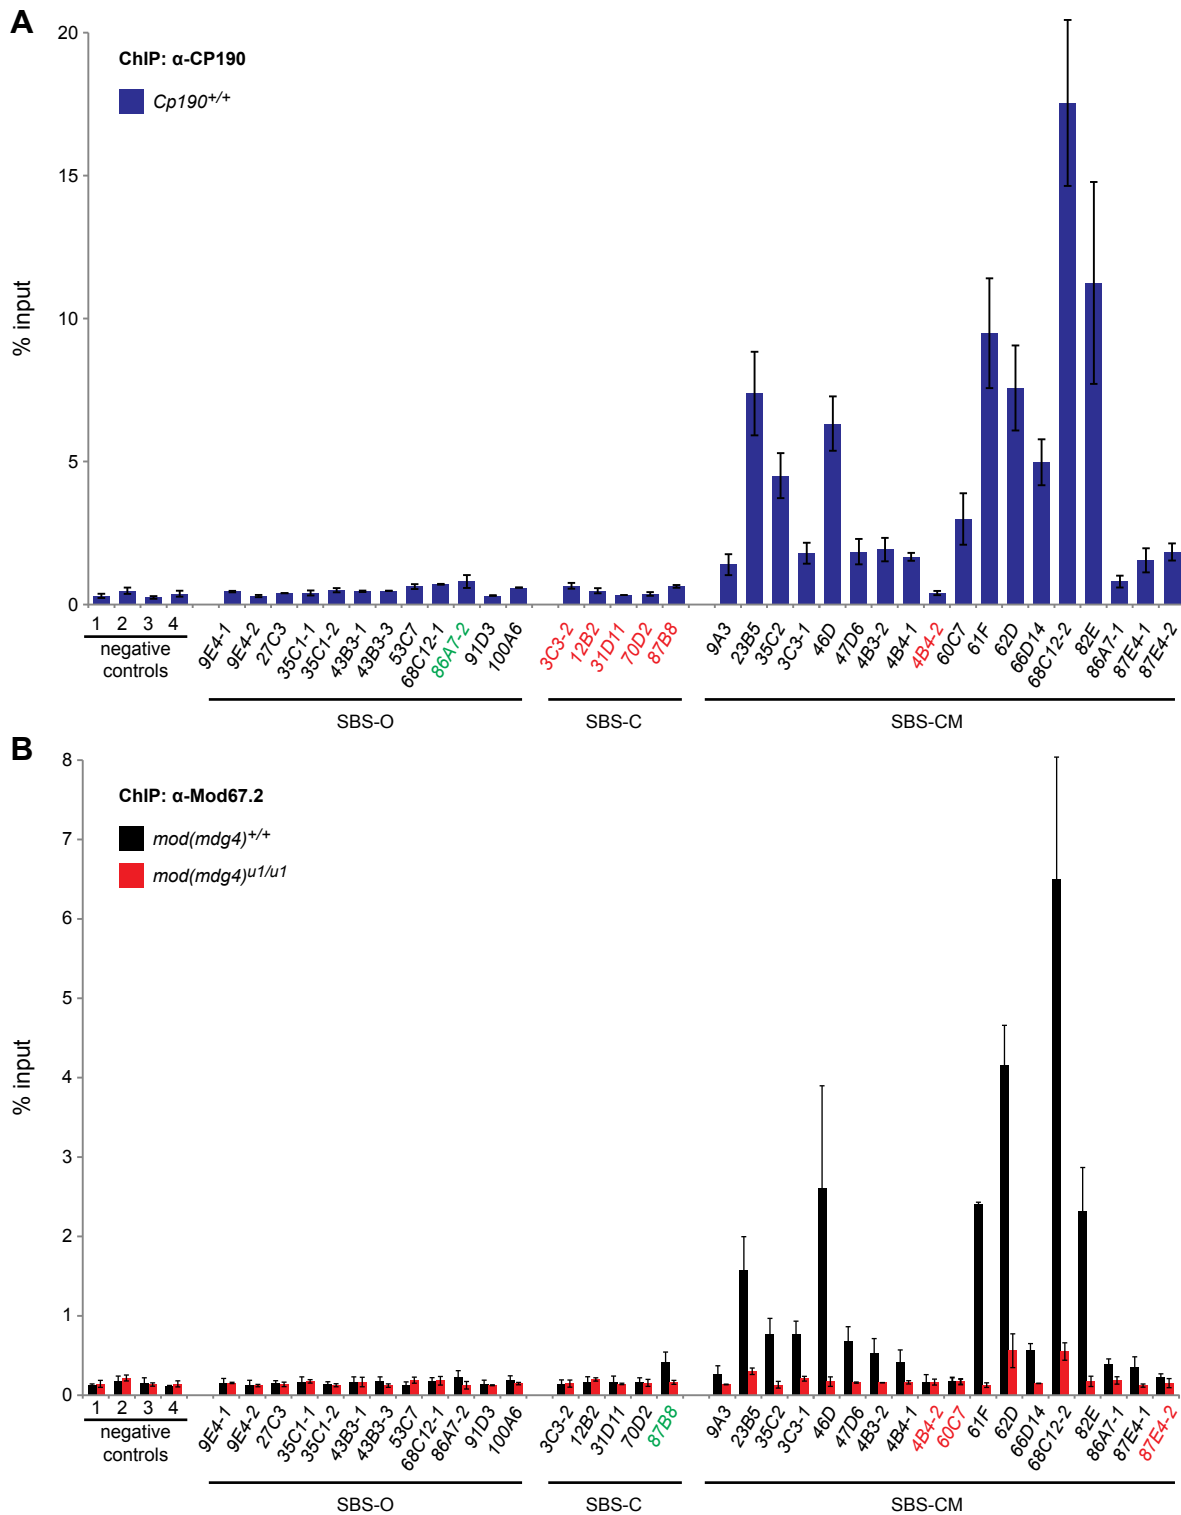

**Fig. S2. CP190 and Mod67.2 association at SBSs in the ovary.** (A,B) ChIP-qPCR analyses of ovary CP190 (A) and Mod67.2 (B) distribution. Negative controls: genomic regions with no SBS and no reported CP190 and Mod67.2 association. Sites are arranged into classes based on ModEncode results [SBS-O, SBS-C and SBS-CM (Negre et al., 2010, Soshnev et al., 2012)] and are labeled based on cytological location. Red indicates a loss of protein occupancy in the ovary relative to embryos; green indicates gain of occupancy in the ovary relative to embryos. In B,  $mod(mdg4)^{u1}$  null mutant background is shown as an additional negative control (black bars). In total, 28/35 (80%) sites demonstrate expected CP190 occupancy and 31/35 (89%) sites demonstrate expected Mod67.2 occupancy. Error bars indicate s.d. of two independent biological replicates.

**Table S1. Alleles and genotypes used in the study**

| <b><i>su(Hw)</i> mutant alleles</b>             |                                                                                    |          |                                                                                          |                       |
|-------------------------------------------------|------------------------------------------------------------------------------------|----------|------------------------------------------------------------------------------------------|-----------------------|
| Allele                                          | Genotype                                                                           | Stock    | Lesion                                                                                   | Reference             |
| <i>su(Hw)<sup>2</sup></i>                       | $y^2 w^{67c23} ct^6 f^1; su(Hw)^2/TM6B Tb$                                         | n/a      | <i>jockey</i> insertion in first intron of <i>su(Hw)</i> gene                            | Harrison et al., 1993 |
| <i>su(Hw)<sup>v</sup></i>                       | $y^2 ct^6 f^1; su(Hw)^v/TM6B Tb$                                                   | n/a      | deletion encompassing <i>su(Hw)</i> TSS and <i>RpII 15</i> gene                          | Harrison et al., 1992 |
| <i>su(Hw)<sup>Pb</sup></i>                      | $y^2 w^{67c23} ct^6 f^1; su(Hw)^{Pb04061}/TM6B Tb$                                 | n/a      | <i>piggyBac</i> insertion in first intron of <i>su(Hw)</i> gene                          | Baxley et al., 2011   |
| <i>su(Hw)<sup>f</sup></i>                       | $y^2 w^{67c23} ct^6 f^1; su(Hw)^f Ubx^+/su(Hw)^v$                                  | n/a      | C525Y mutation disrupting Su(Hw) ZF10 backbone                                           | Harrison et al., 1993 |
| <i>su(Hw)<sup>A2663</sup></i>                   | $y^2 w^{67c23} ct^6 f^1; su(Hw)^{A2663}/TM6B Tb$                                   | n/a      | EMS-generated deletion encompassing +3534 to +4633 bp relative to the TSS                | n/a                   |
| <b>Reference wild-type alleles</b>              |                                                                                    |          |                                                                                          |                       |
| Allele                                          | Genotype                                                                           | Stock    | Lesion                                                                                   | Reference             |
| <i>Canton S</i>                                 | <i>Canton-S</i>                                                                    | BL 1     | n/a                                                                                      |                       |
| <i>BL15598</i>                                  | $y^1 w^{67c23}; Pfw^{+mC} v^{+mDm2}=EPgy2/CG6499^{EY02782}$                        | BL 15598 | n/a                                                                                      |                       |
| <b>gypsy insulator partners</b>                 |                                                                                    |          |                                                                                          |                       |
| Allele                                          | Genotype                                                                           | Stock    | Lesion                                                                                   | Reference             |
| <i>Cp190<sup>H4-1</sup></i>                     | $y^2 w ct^6 omb^{P1-D11}; Cp190^{H4-1}/TM6B$                                       |          | truncation of the 331 amino acids at the C-terminus of CP190                             | Pai et al., 2004      |
| <i>Cp190<sup>P11</sup></i>                      | $y^2 w ct^6; Cp190^{P11}/TM6B$                                                     |          | deficiency encompassing <i>Set</i> , <i>Osep</i> , <i>Cp190</i> and <i>Mrg15</i> genes   | Pai et al., 2004      |
| <i>mod(mdg4)<sup>u1</sup></i>                   | $y^2 ct^6; mod(mdg4)^{u1}/mod(mdg4)^{u1}$                                          |          | <i>Stalker</i> insertion causing Mod67.2 truncation by 145 amino acids at the C-terminus | Gause et al., 2001    |
| <b>Target gene alleles and deficiency lines</b> |                                                                                    |          |                                                                                          |                       |
| Allele                                          | Genotype                                                                           | Stock    | Lesion                                                                                   | Reference             |
| <i>Rbp9<sup>P2690</sup></i>                     | $w^*; Pfw^{+mC} lacW/Rbp9^{P2690}/CyO$                                             | BL 25778 | P-element insertion within the coding sequence of <i>Rbp9</i> gene                       | Kim-Ha et al., 1999   |
| <i>Rbp9<sup>P2775</sup></i>                     | $w^*; Pfw^{+mC} lacW/Rbp9^{P2775}/CyO$                                             | BL 25777 | P-element insertion within the coding sequence of <i>Rbp9</i> gene                       | Kim-Ha et al., 1999   |
| <i>Df(2L)ED206</i>                              | $w^{1118}; Df(2L)ED206, Pfw^{+mW.Scer:FRT.hs3} 3'.RS5+3.3'/ED206/SM6a$             | BL 8038  | deficiency                                                                               |                       |
| <i>Df(2L)ED270</i>                              | $w^{1118}; Df(2L)ED270, Pfw^{+mW.Scer:FRT.hs3} 3'.RS5+3.3'/ED270/SM6a$             | BL 8039  | deficiency                                                                               |                       |
| <i>Df(2L)ED4651</i>                             | $w^{1118}; Df(2L)ED4651, Pfw^{+mW.Scer:FRT.hs3} 3'.RS5+3.3'/ED4651/SM6a$           | BL 8904  | deficiency                                                                               |                       |
| <i>Df(2R)Exel6284</i>                           | $w^{1118}; Df(2R)Exel6284, Pfw^{+mC} XP-U/Exel6284/CyO$                            | BL 7749  | deficiency                                                                               |                       |
| <i>Df(2R)BSC858</i>                             | $w^{1118}; Df(2R)BSC858, P+PBacfw^{+mC} XP3.WH3/BSC858/SM6a$                       | BL 27928 | deficiency                                                                               |                       |
| <i>Df(2R)ED1735</i>                             | $w^{1118}; Df(2R)ED1735, Pfw^{+mW.Scer:FRT.hs3} 3'.RSS+3.3'/ED1735/SM6a$           | BL 9275  | deficiency                                                                               |                       |
| <i>Df(2R)ED3683</i>                             | $w^{1118}; Df(2R)ED3683, Pfw^{+mW.Scer:FRT.hs3} 3'.RSS+3.3'/ED3683/SM6a$           | BL 8918  | deficiency                                                                               |                       |
| <i>Df(2R)50C-38</i>                             | $Df(2R)50C-38, al^1 b^1 cn^1 Pfw^{+mC} CaSpeR/Cp1^{50C-38}/CyO, amos^{Roi-1} bw^l$ | BL 8114  | deficiency                                                                               |                       |

**Table S2. Primers used in qPCR analyses**

| <b>Gene expression analyses</b> |                               |                                |
|---------------------------------|-------------------------------|--------------------------------|
| <b>Target</b>                   | <b>Forward</b>                | <b>Reverse</b>                 |
| <i>GAPDH2</i>                   | CACTCGTCGGTGTTTCGATGCCAAG     | TCGATGACGCGGTTGGAGTAGC         |
| <i>Ras64B</i>                   | AGGAAAGTGTCTGCCTGATGTAGAAG    | TTATATGTTGGCTCCTGCTTCCGC       |
| <i>bTub56D</i>                  | AGTTCACCGCTATGTTCA            | CGCAAAACATTGATCGAG             |
| <i>su(Hw)</i>                   | ATACCCTGCGACGGCACATACG        | TTCACGCACCACAACGCCATTC         |
| <i>CG6293</i>                   | TGCCATCATTAAACATTATCATCGCCC   | ATCGGTGCTACTGGGCACTACAATTCTC   |
| <i>CG1468</i>                   | ATAGGAGCCACGGGTTTCTTCACT      | ATTTGTGCGCAGACGCATATCACC       |
| <i>L(1)G0148</i>                | CAACTGGCGCAGATGGATCAAACA      | AGACAGTTGAGGCCAAACTGAGGGA      |
| <i>CG7582</i>                   | TCCGTTTTCCACATCCATCAG         | GAACGCAACCACCAAACCTTAG         |
| <i>CG9416</i>                   | GCGAGCACAGTGAGTCATAA          | AGCTCCGAGTCACAATCAATAC         |
| <i>Oct-TyrR</i>                 | CGCTGGGCTCCTTCTTTATT          | GCGATCGTGTTAAGCTTGTTG          |
| <i>neuroligin</i>               | TCGTGTTCCGGGGAGTATAGCTGCTAC   | GCAGTTCACCAGCAGCTTCTCTTC       |
| <i>Rph</i>                      | AACAACCTCCGGCAACTCACAACCG     | AGGCCTCAGATAGCTAATGGCAA        |
| <i>CG12071</i>                  | TGCCACATTGGAGGAACTGATCTG      | AACAACAACAACAACAGCCAGAACAATG   |
| <i>CG14298</i>                  | AATTTCAACTGCTATGTGGGCCGC      | GATTGCGATTGCCGTTGCATCCTT       |
| <i>dpr19</i>                    | TATGACGCAACAGCATCAATCCGC      | AACATGCACTGTAATGCTGGCAGG       |
| <i>Syn2</i>                     | AATGCCAAGTCCTGCAAAGTCTGCTG    | TATATCATTTTTGAGTGTGAGTCCATGCG  |
| <i>CG15760</i>                  | GCAACTCGTCCACGATTCAAAAAG      | GCAACTCGTCCACGATTCAAAAAG       |
| <i>mAcR-60C</i>                 | CTGCTTGGGTATGACCTTGGCGTTG     | TTCAGCCTGCCACTCGGACGG          |
| <i>CG15270</i>                  | TTCACAGCACCAGCAGCAAATAGTG     | ATGAACCAGATGAAGAGTTTGATAATGCG  |
| <i>Rbp9</i>                     | GCAGAGCAACAAGTGCAAGGGC        | AGCTGACCTGAAGCACTCGGTTGC       |
| <i>CG3104</i>                   | TGTGGATAGCAGCCCAGATGGGAC      | TGTGGATAGCAGCCCAGATGGGAC       |
| <i>Mob2</i>                     | AAATCCGAAGCATAAATCTGGTTATCTCC | CCAACACAACCACAAATCGCACC        |
| <i>Rbp9-TSS1</i>                | CGCAAATCCAGGGGTATTAACAGG      | TTGATGGTCATATCCTCCTCGTGG       |
| <i>Rbp9-TSS2</i>                | GTGGAATCCGAATCAGTATCGAAATC    | CATACAACACCGATTTTCCCACTC       |
| <i>Rbp9-TSS3</i>                | CTTCCGTTTTGTCTCGCCTTATGTTTTG  | ACTGGTTGCTAATCAGTAGATTCTCTACG  |
| <b>ChIP-QPCR</b>                |                               |                                |
| <b>Target</b>                   | <b>Forward</b>                | <b>Reverse</b>                 |
| <i>chip neg 1</i>               | GTATATCCACATCACCAGACCTCAGG    | ACATCCTCGAATCACTATGCAAGTCG     |
| <i>chip neg 2</i>               | CACTCGTCGGTGTTTCGATGCCAAG     | TCGATGACGCGGTTGGAGTAGC         |
| <i>chip neg 3</i>               | C TTCGACTTGATGTGATACTTCTGCT   | AACGGATTGGAGATCGCATCAGC        |
| <i>chip neg 4</i>               | ACATCGGAGCCAGTGCCTCG          | TATCCGACACCGTGGTAGTAGTCTGC     |
| <i>Rbp9 SBS1</i>                | ATACTTGTAGGCAGCGGGATGGG       | AGAGAGAGCAAGGCAGGAGCGTAGG      |
| <i>Rbp9 SBS2</i>                | AAGAACATTTTTCCAGTCCCAGTTCAG   | TTCTCTGTTTCGCTTACATTTATTCGCCAG |
| <i>Rbp9 SBS3</i>                | TAAGCTCGCTCTCTGGCTCCATTTC     | AGATAGAGCGGGAGAGACAGTGAGAGC    |
| <i>9E4-1</i>                    | TGCGGAGCGTTTGCAATCGGTTG       | ATAACGGTAAACGCCAGCCTGTTTG      |
| <i>9E4-2</i>                    | AACCTTCAACTCCCACCGCACCAC      | TTCCAGAACCAACGACTATATCCCCAAC   |
| <i>27C3</i>                     | ACAAATGCTTGTTCGCTTTCGCC       | GTTGGCTTCGCGTACACGGAATTT       |
| <i>35C1-1</i>                   | ACACAAACACTGAGAGCGCCGATA      | TTCTATGCCAGGATCCGTTGGTGA       |
| <i>35C1-2</i>                   | TGCAAGCCCCGACAATATCAGACCT     | GCGCACTTAAGCGCCATGAAGTAT       |
| <i>4B3-1</i>                    | CAGTGGAGAAGCGAGACAATC         | CGGACTGACTGACAAGTACATAAA       |
| <i>4B3-3</i>                    | TACGCCCAGTGTGCACCATAACTA      | AGCGTTCAGTTCAGCTCATAACCCA      |
| <i>53C7</i>                     | TCCGCTAGCGAAGTGTTTATAACG      | TTGCCCACTTCAGGCCAAATGTAC       |
| <i>68C12-1</i>                  | AGGCGAAGCATGTGGTATAGTGGT      | ATGCGCCCTGATGTAGGCTATGAA       |
| <i>86A7-2</i>                   | TGCCAGCGGCTATTACAACACCTA      | TCGTTTCGATGGTTCGATGGACGAA      |
| <i>91D3</i>                     | ATTGTTGCTCTCGGTGCCTGTTTG      | GTTTGCCTACTTTCTGTGGCAGCA       |
| <i>100A6</i>                    | CGTTGCATATCTCAAGGCGTCCAAAC    | GCCATAACCACTGTGCGTGACCAG       |
| <i>3C3-2</i>                    | AGCATCTAAACGAAAGCCACCGGA      | AATCACACAGGGGCGACGTCATCTA      |
| <i>12B2</i>                     | GCAGCACTCAGTTAGCAACAATTTCTCTC | TCCGTTATTTGTACCACATGCTGTTGTTGC |
| <i>31D11</i>                    | CTCATAAACTGAAGTTCGTTGCGAGGAGG | AGTAGCAAAAACATGATAAATGCAAGTG   |
| <i>70D2</i>                     | GCACAGATAAGACCGCCAATTGT       | AATTAGCGGCCACGTTTGTTCGC        |
| <i>87B8</i>                     | TTTGGGCAACACTAGAACATCTGGGAC   | AGCAGGGAAACAAATTTACTTCAGGAC    |
| <i>9A3</i>                      | AGCTCGAGGCAATTATGTTTGCGG      | AAGAATTGGCGAAGAACGCACCAG       |
| <i>23B5</i>                     | AACCGATTGCTTCCAAAGTTGGCG      | TAGGCGTCGCTCACTCAATGAACT       |
| <i>35C2</i>                     | ATAGATGCACCCAAACACAACGGC      | ACACCCAACTGACCATCCAGTCAA       |
| <i>3C3-1</i>                    | ACCGCTACTTCACCATACCATAGC      | CGTGTGCAACATTCCATTTCCCA        |
| <i>46D</i>                      | AGCAGTTATTGTAGGGACAGGTTGATGG  | AAGTGGCAACGCTAAAGGAAAGAGTG     |
| <i>47D6</i>                     | ATCTGGAGCTCCTGCTATTGGCAT      | AGCAGCGAAGAGAGTTTCGCTAAGA      |

|                |                                |                                |
|----------------|--------------------------------|--------------------------------|
| <b>4B3-2</b>   | AGTTCCATCTGCAGTATCGCTCCA       | AGCTGATTTGAATGCGGCTGTGTC       |
| <b>4B4-1</b>   | ATGCCACGACTCAATGGGCAAATC       | ATGCGTGTGTGTGCCAGTATCTGT       |
| <b>4B4-2</b>   | TGCACTTGTGGATGTCTCTGTGGA       | AATCCTCCAGCACTACAGCACCTT       |
| <b>60C7</b>    | TGTAACGGTGACATCGCTGCTGTT       | AGAGGCAGCATCTCTTAGCCCAAA       |
| <b>61F</b>     | CAGACCAATGTCTACAGCTCAATAGGCG   | AGGTACACATAAGTATGAAAGAATGACCG  |
| <b>62D</b>     | GAATCGCCGCAAATTGGTCGG          | CGGGCAAACGTATTTAAATTTTCAGCC    |
| <b>66D14</b>   | GAGCGCCGCAATACATTACATT         | AGCTGCTGATCCTCGCTTCCATA        |
| <b>68C12-2</b> | TCGGTGCGATTTGTGGTTGTGTTG       | CCAGCCTGAAAGTATGCACCGAAA       |
| <b>82E</b>     | TAAGACCAATAATGAATGAGTCAAGCACAG | TTAAGCATGTGAAACAGTAGTGTGAAACTG |
| <b>86A7-1</b>  | AAACTAATTGGGCTAACGCACGGG       | TTCGATAGAAAGATCACGCCATTGAG     |
| <b>87E4-1</b>  | TCCAGGGTGTTCTTGAAGTTTCCC       | GCAGCAGATGGGCATAACCACAAA       |
| <b>87E4-2</b>  | TACGACCAGTGCTTGGGTTCAAGT       | ACATCCTGCTCGGACTTTGCCTAT       |

**Table S3. Results of gene expression microarray analyses and identification of direct target genes**

| NULL vs WT 1% FDR |                     |        |          | FLYATLAS |       |       |       | dm3 coordinates |          |          | Su(Hw) targets |          |       |         |
|-------------------|---------------------|--------|----------|----------|-------|-------|-------|-----------------|----------|----------|----------------|----------|-------|---------|
| Probeset ID       | Gene Symbol         | Fold   | P-value  | Brain    | TAG   | L CNS | Ovary | chr             | start    | end      | Su(Hw)         | Su(Hw)-F | CP190 | Mod67.2 |
| 1631004 s at      | su(Hw)              | -130.4 | 1.58E-20 | 0.50     | 0.40  | 1.45  | 2.70  | chr3R           | 10130177 | 10134309 |                |          |       |         |
| 1637063 at        | CG33099             | -9.06  | 3.41E-04 | 0.00     | 0.10  | 0.20  | 0.40  | chr3R           | 18354642 | 18356294 |                |          |       |         |
| 1636954 at        | NetB                | -7.72  | 2.00E-06 | 20.30    | 19.00 | 25.29 | 0.30  | chrX            | 14580071 | 14643409 |                |          |       |         |
| 1624580 at        | GstZ1               | -7.68  | 8.64E-14 | 0.30     | 0.40  | 0.28  | 1.30  | chr3R           | 5281239  | 5282268  |                |          |       |         |
| 1640327 at        | CG6023              | -5.94  | 2.12E-11 | 1.00     | 0.90  | 0.39  | 1.70  | chrX            | 18208156 | 18215198 |                |          |       |         |
| 1637281 at        | trol                | -4.50  | 2.84E-05 | 1.60     | 0.80  | 2.96  | 0.50  | chrX            | 2364493  | 2438795  |                |          |       |         |
| 1625688 at        | CG6293              | -4.25  | 6.54E-09 | 0.30     | 0.30  | 0.65  | 2.00  | chr3R           | 6133528  | 6137335  |                |          |       |         |
| 1641327 at        | CG9416              | -4.00  | 4.56E-07 | 0.10     | 0.30  | 0.28  | 0.20  | chr2R           | 15254753 | 15261207 |                |          |       |         |
| 1630886 at        | SeIR                | -3.66  | 3.47E-05 | 4.10     | 2.90  | 0.63  | 0.80  | chr3R           | 6689077  | 6694364  |                |          |       |         |
| 1639411 at        | l(1)G0148           | -3.00  | 5.54E-13 | 0.50     | 0.30  | 0.56  | 1.60  | chrX            | 6548649  | 6553742  |                |          |       |         |
| 1636099 s at      | mbl                 | -2.88  | 7.82E-06 | 20.80    | 15.20 | 5.18  | 0.40  | chr2R           | 13104054 | 13266881 |                |          |       |         |
| 1629897 a at      | CG6044              | -2.74  | 1.45E-04 | 26.50    | 32.70 | 2.84  | 0.10  | chr2R           | 18291678 | 18295880 |                |          |       |         |
| 1632932 a at      | mp                  | -2.68  | 1.29E-06 | 22.90    | 15.00 | 8.26  | 0.80  | chr3L           | 6991943  | 7046528  |                |          |       |         |
| 1625780 a at      | CG9812              | -2.15  | 1.56E-04 | 0.20     | 0.10  | 0.14  | 0.00  | chr2R           | 19299859 | 19307207 |                |          |       |         |
| 1637590 at        | CG42329             | -7.30  | 1.70E-04 | 0.10     | 0.00  | 0.09  | 0.10  | chr2L           | 1219293  | 1229802  |                |          |       |         |
| 1627441 at        | Oct-TyrR            | -3.98  | 4.94E-05 | 27.90    | 26.80 | 16.30 | 0.70  | chr3L           | 22028103 | 22058379 |                |          |       |         |
| 1629072 at        | CG42259 / su(w[al]) | -2.11  | 3.52E-04 | 0.30     | 0.30  | 0.53  | 1.40  | chrX            | 906812   | 941042   |                |          |       |         |
| 1639733 s at      | CG14275             | -6.74  | 4.13E-06 | 0.10     | 0.20  | 0.25  | 0.20  | chr2L           | 8327456  | 8332911  |                |          |       |         |
| 1632021 at        | Cyp6a20             | -16.78 | 6.62E-20 | 1.10     | 2.20  | 0.14  | 0.10  | chr2R           | 10769625 | 10771551 |                |          |       |         |
| 1633427 at        | CG7582              | -12.36 | 4.29E-12 | 22.00    | 21.40 | 2.69  | 0.20  | chr3R           | 25505963 | 25508000 |                |          |       |         |
| 1638996 at        | CG11727             | -5.19  | 3.88E-08 | 3.50     | 2.30  | 2.21  | 1.50  | chrX            | 11324556 | 11348371 |                |          |       |         |
| 1636119 at        | CG1468              | -4.95  | 1.13E-08 | 0.30     | 0.50  | 0.05  | 0.00  | chrX            | 9772455  | 9773312  |                |          |       |         |
| 1623949 s at      | CG32816             | -2.83  | 1.70E-05 | 0.30     | 0.10  | 0.37  | 1.60  | chrX            | 210609   | 364670   |                |          |       |         |
| 1631326 at        | Zasp66              | -2.70  | 2.74E-04 | 0.10     | 0.30  | 0.19  | 0.00  | chr3L           | 8617471  | 8631773  |                |          |       |         |
| 1635742 s at      | Cad74A              | -2.53  | 1.09E-04 | 0.00     | 0.00  | 0.74  | 2.10  | chr3L           | 17360853 | 17372630 |                |          |       |         |
| 1626028 at        | CG4783              | -2.33  | 9.24E-05 | 0.00     | 0.00  | 0.00  | 0.00  | chr3R           | 15774192 | 15774629 |                |          |       |         |
| 1634440 s at      | Eip74EF             | -2.14  | 1.97E-04 | 3.20     | 1.90  | 0.24  | 0.60  | chr3L           | 17551772 | 17612425 |                |          |       |         |
| 1641042 at        | CG16820             | -8.68  | 4.12E-07 | 0.20     | 0.00  | 0.07  | 0.00  | chr2L           | 13246232 | 13250189 |                |          |       |         |
| 1637670 s at      | CHES-1-like         | -3.99  | 1.86E-06 | 1.70     | 1.40  | 0.72  | 2.50  | chrX            | 7576371  | 7603418  |                |          |       |         |
| 1628859 at        | shi                 | -2.21  | 1.74E-05 | 14.10    | 14.60 | 5.74  | 0.70  | chrX            | 15786149 | 15800725 |                |          |       |         |
| 1630026 s at      | dpp                 | -2.01  | 8.39E-05 | 0.70     | 0.90  | 1.98  | 0.40  | chr2L           | 2428372  | 2459823  |                |          |       |         |
| 1633645 at        | CG42565             | -39.31 | 1.04E-08 | 0.00     | 0.10  | 0.06  | 1.40  | chr2R           | 18547988 | 18548894 |                |          |       |         |
| 1636485 at        | CTCF                | -17.52 | 1.45E-04 | 2.00     | 3.50  | 0.66  | 1.50  | chr3L           | 7346678  | 7349813  |                |          |       |         |
| 1637180 at        | CG17977             | -11.15 | 9.61E-15 | 3.70     | 3.10  | 3.11  | 1.60  | chr2R           | 3953779  | 3955160  |                |          |       |         |
| 1640681 at        | CG4950              | -10.35 | 1.85E-05 | 2.10     | 0.80  | 0.03  | 0.10  | chr3L           | 16258897 | 16261256 |                |          |       |         |
| 1636826 at        | CG14072             | -10.26 | 6.43E-09 | 0.00     | 0.10  | 0.04  | 0.10  | chr2L           | 10936662 | 10937931 |                |          |       |         |
| 1637366 at        | nimC4               | -8.62  | 9.43E-07 | 0.20     | 0.20  | 0.16  | 0.10  | chr2L           | 14047582 | 14048863 |                |          |       |         |
| 1631803 at        | Lsp1alpha           | -8.46  | 9.00E-09 | 1.60     | 1.30  | 5.62  | 0.50  | chrX            | 12384416 | 12386933 |                |          |       |         |
| 1628918 at        | CG17478             | -8.40  | 2.73E-04 | 0.10     | 0.20  | 0.10  | 4.20  | chr2R           | 508621   | 510016   |                |          |       |         |
| 1625063 a at      | CG31606             | -8.40  | 3.38E-06 | 0.50     | 0.70  | 0.15  | 0.40  | chr2L           | 8147626  | 8148356  |                |          |       |         |
| 1628896 a at      | CG4210              | -8.38  | 1.04E-04 | 0.00     | 0.10  | 0.01  | 0.70  | chr3R           | 11039696 | 11040567 |                |          |       |         |
| 1630256 at        | lectin-24Db         | -8.07  | 1.76E-06 | 1.90     | 0.90  | 0.05  | 0.10  | chr2L           | 4188123  | 4189284  |                |          |       |         |
| 1631555 at        | CG10062             | -8.01  | 2.53E-11 | 0.20     | 0.20  | 0.03  | 0.10  | chr2R           | 15262818 | 15267679 |                |          |       |         |
| 1628882 at        | CG7378              | -6.96  | 1.25E-07 | 1.20     | 1.00  | 0.23  | 0.10  | chrX            | 18794443 | 18803330 |                |          |       |         |
| 1640386 at        | wbl                 | -6.62  | 1.00E-04 | 0.00     | 0.00  | 0.01  | 0.40  | chr2R           | 15137266 | 15138419 |                |          |       |         |
| 1629310 at        | Trf4-1              | -6.52  | 4.76E-09 | 0.60     | 0.40  | 0.21  | 2.40  | chrX            | 8454662  | 8464192  |                |          |       |         |
| 1628258 at        | CG14526             | -6.36  | 1.24E-04 | 0.20     | 0.20  | 0.05  | 0.10  | chr3R           | 24709415 | 24711737 |                |          |       |         |
| 1639502 at        | nimC1               | -5.91  | 1.19E-07 | 1.70     | 1.10  | 0.42  | 0.20  | chr2L           | 13974119 | 13976753 |                |          |       |         |
| 1624101 at        | Cyp6a23             | -5.35  | 1.23E-07 | 0.10     | 0.10  | 0.03  | 0.10  | chr2R           | 10763338 | 10765159 |                |          |       |         |
| 1629572 a at      | fat-spondin         | -5.11  | 3.30E-05 | 1.40     | 2.90  | 0.21  | 0.00  | chr2R           | 12941508 | 12946810 |                |          |       |         |
| 1641477 at        | CG32447             | -4.89  | 1.61E-06 | 0.70     | 0.30  | 3.73  | 0.40  | chr3L           | 21683712 | 21699465 |                |          |       |         |

|              |              |       |          |      |      |       |      |       |          |          |  |  |  |
|--------------|--------------|-------|----------|------|------|-------|------|-------|----------|----------|--|--|--|
| 1638376 at   | Osi15        | -4.51 | 1.36E-04 | 0.00 | 0.10 | 0.13  | 0.00 | chr3R | 2127526  | 2129375  |  |  |  |
| 1631710 at   | KaiRIA       | -4.26 | 1.63E-04 | 0.40 | 0.40 | 0.37  | 0.30 | chr3R | 16474317 | 16478172 |  |  |  |
| 1634427 at   | CG15461      | -4.14 | 2.78E-09 | 0.10 | 0.10 | 0.08  | 0.10 | chrX  | 20357207 | 20357615 |  |  |  |
| 1641455 at   | CG6762       | -4.03 | 4.61E-07 | 2.20 | 1.50 | 0.74  | 0.60 | chrX  | 17751007 | 17752643 |  |  |  |
| 1623025 at   | CG3457       | -4.02 | 2.73E-04 | 0.10 | 0.10 | 0.08  | 1.80 | chrX  | 2081853  | 2082743  |  |  |  |
| 1624816 at   | CG30283      | -3.83 | 6.70E-07 | 1.50 | 1.60 | 2.47  | 1.40 | chr2R | 17427089 | 17428078 |  |  |  |
| 1633152 at   | mod(mdg4)    | -3.82 | 8.89E-05 | 3.00 | 2.50 | 0.89  | 3.20 | chr3R | 17177331 | 17203121 |  |  |  |
| 1624663 a at | vis          | -3.75 | 2.38E-10 | 0.10 | 0.10 | 0.10  | 0.10 | chr2R | 8395396  | 8398311  |  |  |  |
| 1640957 at   | Hexo2        | -3.72 | 6.55E-05 | 3.90 | 4.50 | 1.64  | 0.60 | chrX  | 8603685  | 8606513  |  |  |  |
| 1623327 at   | CG43103      | -3.58 | 6.15E-07 | 0.20 | 0.20 | 0.01  | 0.10 | chr2R | 13026956 | 13027430 |  |  |  |
| 1626534 at   | tko          | -3.55 | 3.37E-12 | 0.80 | 1.00 | 0.98  | 1.30 | chrX  | 2336346  | 2338009  |  |  |  |
| 1629430 s at | regucalcin   | -3.46 | 3.66E-04 | 1.60 | 0.40 | 0.05  | 0.00 | chrX  | 11906467 | 11911091 |  |  |  |
| 1632656 at   | CG12112      | -3.33 | 7.77E-13 | 0.30 | 0.40 | 0.64  | 2.10 | chrX  | 8452912  | 8454225  |  |  |  |
| 1625901 s at | CG34172      | -3.33 | 1.35E-04 | 0.00 | 0.10 | 0.00  | 0.00 | chr2L | 2192525  | 2197912  |  |  |  |
| 1639476 at   | Vago         | -3.30 | 1.96E-07 | 0.10 | 0.10 | 0.07  | 0.00 | chrX  | 10983323 | 10984138 |  |  |  |
| 1628425 at   | CG31898      | -3.29 | 1.13E-05 | 0.50 | 0.60 | 0.89  | 3.40 | chr2L | 8400457  | 8401477  |  |  |  |
| 1629106 at   | CG2233       | -3.28 | 3.06E-05 | 0.30 | 0.30 | 0.01  | 0.00 | chrX  | 7929774  | 7931550  |  |  |  |
| 1634191 at   | CG6398       | -3.22 | 2.19E-20 | 0.10 | 0.10 | 0.40  | 1.90 | chrX  | 17724873 | 17735628 |  |  |  |
| 1623555 at   | CG10131      | -3.07 | 9.14E-05 | 1.20 | 0.80 | 0.12  | 0.10 | chr2R | 10517418 | 10518526 |  |  |  |
| 1637315 at   | larp         | -3.06 | 5.65E-05 | 0.80 | 1.00 | 0.75  | 1.30 | chr3R | 24143884 | 24162162 |  |  |  |
| 1633329 at   | yellow-h     | -3.06 | 1.02E-05 | 1.20 | 1.10 | 0.44  | 0.10 | chr4  | 248548   | 251054   |  |  |  |
| 1635125 a at | LM408        | -3.04 | 2.64E-04 | 0.80 | 1.00 | 0.31  | 0.10 | chr2L | 10457656 | 10462475 |  |  |  |
| 1627324 at   | lola         | -2.98 | 2.15E-04 | 5.30 | 3.60 | 15.11 | 1.20 | chr2R | 6369712  | 6430794  |  |  |  |
| 1624599 at   | CG34331      | -2.98 | 4.97E-07 | 0.30 | 0.20 | 0.03  | 0.00 | chrX  | 20016486 | 20017094 |  |  |  |
| 1639737 at   | CG34330      | -2.98 | 2.17E-04 | 0.00 | 0.00 | 0.01  | 0.00 | chrX  | 18962306 | 18962925 |  |  |  |
| 1632650 at   | CG5867       | -2.83 | 1.67E-05 | 0.20 | 0.10 | 0.37  | 0.10 | chr2L | 13236494 | 13239297 |  |  |  |
| 1637421 at   | Ch2          | -2.83 | 1.48E-05 | 0.50 | 0.40 | 1.50  | 2.00 | chr3L | 1752328  | 1755934  |  |  |  |
| 1624836 at   | CG13795      | -2.73 | 2.91E-05 | 0.20 | 0.40 | 0.11  | 0.00 | chr2L | 7723310  | 7726298  |  |  |  |
| 1632200 s at | Edem1        | -2.71 | 4.83E-05 | 0.70 | 0.80 | 1.32  | 1.30 | chrX  | 1797735  | 1802860  |  |  |  |
| 1638127 s at | Dlic         | -2.71 | 1.45E-10 | 1.80 | 2.10 | 1.27  | 1.70 | chrX  | 11048434 | 11057245 |  |  |  |
| 1630170 at   | Cyp12b2      | -2.63 | 7.81E-07 | 3.40 | 5.10 | 0.71  | 0.10 | chr2R | 14642500 | 14644588 |  |  |  |
| 1625140 at   | NtR          | -2.63 | 9.95E-08 | 1.60 | 0.90 | 0.14  | 0.10 | chr2R | 18015314 | 18017689 |  |  |  |
| 1631165 at   | GstE14       | -2.61 | 1.99E-05 | 0.10 | 0.00 | 1.05  | 0.70 | chr2R | 9127233  | 9128523  |  |  |  |
| 1632591 at   | Phk-3        | -2.56 | 3.08E-04 | 0.10 | 0.10 | 0.20  | 0.10 | chr2R | 20858366 | 20859365 |  |  |  |
| 1637066 at   | CG8239       | -2.55 | 6.61E-06 | 0.40 | 0.20 | 0.93  | 2.60 | chrX  | 15643210 | 15645255 |  |  |  |
| 1629395 at   | CG9743       | -2.55 | 9.13E-06 | 0.80 | 1.60 | 0.77  | 0.10 | chr3R | 26022082 | 26028715 |  |  |  |
| 1633880 s at | Ir76a        | -2.54 | 2.89E-04 | 6.60 | 4.80 | 1.62  | 1.50 | chr3L | 19792378 | 19796527 |  |  |  |
| 1625023 a at | nAcRbeta-21C | -2.51 | 1.69E-04 | 1.40 | 0.60 | 0.14  | 0.00 | chr2L | 545129   | 547096   |  |  |  |
| 1637144 a at | Map205       | -2.49 | 5.63E-06 | 1.00 | 1.10 | 2.81  | 2.20 | chr3R | 27881001 | 27894163 |  |  |  |
| 1623486 at   | CG7900       | -2.48 | 1.07E-04 | 0.10 | 0.10 | 0.39  | 0.30 | chr3R | 3919846  | 3930805  |  |  |  |
| 1638567 at   | CG1092       | -2.47 | 1.09E-04 | 1.30 | 0.50 | 0.13  | 0.10 | chr3R | 92492    | 94038    |  |  |  |
| 1639059 s at | exu          | -2.43 | 2.84E-04 | 0.00 | 0.00 | 0.00  | 1.70 | chr2R | 16554924 | 16558379 |  |  |  |
| 1637135 at   | nej          | -2.41 | 7.23E-05 | 5.10 | 3.10 | 2.69  | 3.50 | chrX  | 9559475  | 9581099  |  |  |  |
| 1628344 at   | CkIIBeta     | -2.38 | 3.43E-04 | 2.20 | 1.30 | 13.79 | 3.30 | chrX  | 11686566 | 11695620 |  |  |  |
| 1638481 at   | CG2736       | -2.38 | 1.04E-04 | 0.20 | 0.20 | 0.03  | 0.00 | chr2R | 20860954 | 20862894 |  |  |  |
| 1628345 at   | Cyp6a9       | -2.38 | 1.59E-04 | 0.60 | 0.60 | 0.25  | 0.80 | chr2R | 10766861 | 10768877 |  |  |  |
| 1623804 a at | hep          | -2.36 | 5.62E-05 | 4.10 | 1.90 | 1.46  | 1.90 | chrX  | 12973240 | 12984466 |  |  |  |
| 1630034 at   | CG12119      | -2.36 | 5.10E-05 | 0.00 | 0.10 | 0.06  | 0.10 | chrX  | 9100153  | 9104580  |  |  |  |
| 1636112 s at | CG33521      | -2.35 | 2.97E-04 | 0.10 | 0.10 | 0.06  | 0.10 | chr4  | 1206394  | 1213482  |  |  |  |
| 1629857 at   | CG10359      | -2.33 | 3.31E-04 | 0.80 | 1.90 | 7.43  | 0.10 | chr3L | 3612192  | 3615244  |  |  |  |
| 1625705 s at | E(Pc)        | -2.31 | 6.26E-05 | 0.90 | 0.90 | 0.82  | 1.80 | chr2R | 7339548  | 7352775  |  |  |  |
| 1630707 at   | edl          | -2.26 | 1.21E-05 | 0.30 | 0.90 | 3.50  | 0.40 | chr2R | 14555026 | 14561037 |  |  |  |
| 1630640 at   | CG4594       | -2.26 | 1.02E-05 | 0.10 | 0.20 | 0.38  | 1.80 | chr2L | 9920160  | 9921459  |  |  |  |
| 1629851 at   | CG31998      | -2.26 | 1.58E-05 | 1.10 | 0.80 | 1.33  | 2.50 | chr4  | 217301   | 226571   |  |  |  |
| 1633254 at   | CG7787       | -2.23 | 2.04E-08 | 0.70 | 0.60 | 0.71  | 1.80 | chr2L | 8320328  | 8321285  |  |  |  |
| 1626694 at   | CG1674       | -2.21 | 3.27E-04 | 0.10 | 0.10 | 0.07  | 0.00 | chr4  | 251356   | 266529   |  |  |  |
| 1636296 at   | CG12945      | -2.21 | 3.09E-04 | 0.60 | 0.30 | 0.37  | 1.70 | chr3R | 5614574  | 5616943  |  |  |  |

|              |                  |       |          |       |       |       |      |       |          |          |  |  |  |  |
|--------------|------------------|-------|----------|-------|-------|-------|------|-------|----------|----------|--|--|--|--|
| 1632744 a at | if               | -2.19 | 2.27E-05 | 0.60  | 0.90  | 1.12  | 0.20 | chrX  | 16646222 | 16677467 |  |  |  |  |
| 1640845 at   | CG10581          | -2.17 | 1.72E-06 | 1.80  | 1.90  | 2.13  | 0.40 | chr3L | 21026654 | 21027303 |  |  |  |  |
| 1638687 at   | CG40298          | -2.11 | 2.16E-05 | 0.30  | 0.20  | 0.26  | 0.40 | chr3L | 23719929 | 23721089 |  |  |  |  |
| 1631331 a at | Pxt              | -2.09 | 4.86E-09 | 0.00  | 0.00  | 0.01  | 1.70 | chr3R | 13545176 | 13548677 |  |  |  |  |
| 1634685 at   | RpL3             | -2.07 | 3.49E-05 | 1.10  | 0.80  | 1.11  | 1.10 | chr3R | 7047616  | 7050895  |  |  |  |  |
| 1641117 a at | CG17600          | -2.07 | 3.52E-06 | 2.10  | 1.50  | 1.87  | 1.90 | chrX  | 21917033 | 21943860 |  |  |  |  |
| 1636900 at   | CG5390           | -2.05 | 2.68E-05 | 0.80  | 0.90  | 1.11  | 0.10 | chr2L | 10304067 | 10306594 |  |  |  |  |
| 1626908 at   | CG8066           | -2.03 | 6.30E-06 | 1.30  | 2.50  | 1.75  | 0.70 | chr3R | 10393333 | 10394569 |  |  |  |  |
| 1637873 at   | sepr-C           | -2.03 | 2.64E-04 | 0.00  | 0.00  | 0.02  | 0.10 | chr3R | 7051242  | 7052204  |  |  |  |  |
| 1629181 at   | CG33494          | -2.03 | 1.36E-06 | 0.30  | 0.20  | 0.24  | 0.00 | chr3R | 21319203 | 21320883 |  |  |  |  |
| 1638782 at   | CG8195           | -2.02 | 5.40E-06 | 3.20  | 3.70  | 1.66  | 2.20 | chr2R | 11450201 | 11453291 |  |  |  |  |
| 1630129 at   | CG43078          | -2.02 | 1.07E-04 | 1.00  | 0.40  | 0.14  | 0.00 | chr3L | 8571842  | 8592717  |  |  |  |  |
| 1636835 at   | CG16700          | -2.02 | 2.48E-04 | 1.50  | 1.90  | 0.85  | 1.40 | chrX  | 16985887 | 16992520 |  |  |  |  |
| 1624851 at   | Tango13          | -2.02 | 4.15E-05 | 1.50  | 1.00  | 0.63  | 1.30 | chrX  | 13457856 | 13487257 |  |  |  |  |
| 1640857 at   | CG10208          | -2.00 | 1.77E-06 | 1.10  | 1.40  | 0.79  | 0.70 | chr3R | 19598720 | 19599849 |  |  |  |  |
| 1638809 at   | CG34284          | 8.06  | 1.55E-04 | 0.00  | 0.00  | 0.01  | 0.00 | chr3R | 14728060 | 14728655 |  |  |  |  |
| 1633646 at   | inaF-B / inaF-D  | 2.08  | 3.37E-04 | 0.40  | 0.10  | 0.02  | 0.00 | chrX  | 11618701 | 11626803 |  |  |  |  |
| 1636409 at   | CG11034          | 2.19  | 2.50E-07 | 0.10  | 0.10  | 0.06  | 0.40 | chr2L | 5805395  | 5808858  |  |  |  |  |
| 1638198 at   | CG12768          | 2.36  | 4.69E-06 | 13.80 | 13.50 | 20.52 | 0.40 | chr3L | 22903591 | 22916632 |  |  |  |  |
| 1639106 at   | Grip             | 2.41  | 6.98E-05 | 0.70  | 1.40  | 1.28  | 0.70 | chrX  | 5860314  | 5880729  |  |  |  |  |
| 1628009 at   | fas              | 2.55  | 5.09E-05 | 35.90 | 41.50 | 41.39 | 0.10 | chr2R | 9510593  | 9636872  |  |  |  |  |
| 1625265 at   | CG9119           | 2.59  | 1.39E-04 | 0.20  | 0.30  | 0.09  | 0.10 | chr3L | 1203316  | 1204795  |  |  |  |  |
| 1623173 at   | CG10013          | 2.93  | 1.76E-07 | 0.30  | 0.50  | 0.34  | 0.40 | chr3R | 8149243  | 8150932  |  |  |  |  |
| 1637957 s at | Rbp9             | 3.08  | 1.92E-18 | 1.00  | 0.60  | 0.06  | 0.10 | chr2L | 2954762  | 2968434  |  |  |  |  |
| 1627961 a at | CG18507          | 3.11  | 2.79E-04 | 0.10  | 0.10  | 0.13  | 0.20 | chr2L | 13665525 | 13672967 |  |  |  |  |
| 1627436 s at | Pdp1             | 3.34  | 1.58E-04 | 7.70  | 8.20  | 1.01  | 0.20 | chr3L | 7805015  | 7860472  |  |  |  |  |
| 1628083 at   | CG5036           | 3.43  | 7.91E-10 | 8.50  | 7.50  | 4.48  | 1.30 | chr2R | 13680387 | 13685633 |  |  |  |  |
| 1640097 at   | Pxn              | 3.49  | 2.89E-04 | 8.10  | 6.70  | 0.62  | 0.40 | chr3L | 2601455  | 2630072  |  |  |  |  |
| 1629205 at   | CG32032          | 4.09  | 6.41E-06 | 9.80  | 10.80 | 9.82  | 0.10 | chr3L | 9086153  | 9087956  |  |  |  |  |
| 1637294 at   | nwk              | 4.50  | 1.81E-06 | 21.60 | 19.00 | 5.17  | 0.10 | chr3L | 9130960  | 9138793  |  |  |  |  |
| 1629269 at   | CG32204          | 4.70  | 1.50E-04 | 42.90 | 14.90 | 18.01 | 0.10 | chr3L | 18915519 | 18939138 |  |  |  |  |
| 1626457 s at | SKIP             | 5.27  | 2.22E-06 | 15.20 | 9.80  | 22.24 | 1.00 | chr3R | 17959552 | 18121848 |  |  |  |  |
| 1641339 at   | CG10137          | 5.36  | 1.59E-07 | 15.20 | 12.70 | 5.11  | 0.40 | chr2L | 19526686 | 19532992 |  |  |  |  |
| 1639110 at   | Slc45-1          | 5.97  | 3.14E-06 | 2.90  | 4.10  | 2.29  | 0.30 | chr3L | 9196165  | 9201953  |  |  |  |  |
| 1640914 at   | CG8838           | 6.40  | 8.65E-09 | 0.00  | 0.00  | 0.01  | 0.00 | chr2L | 3357646  | 3358618  |  |  |  |  |
| 1638381 s at | CG1695 / CG32506 | 7.78  | 3.04E-08 | 18.00 | 7.80  | 4.14  | 0.10 | chrX  | 20304977 | 20315623 |  |  |  |  |
| 1627297 at   | CG15270          | 7.90  | 8.39E-06 | 22.30 | 21.00 | 8.98  | 0.00 | chr2L | 15074776 | 15096915 |  |  |  |  |
| 1626262 s at | CG3104           | 8.02  | 1.19E-14 | 20.60 | 11.50 | 3.91  | 1.40 | chr2L | 2848989  | 2855778  |  |  |  |  |
| 1624577 at   | Ace              | 8.56  | 9.14E-07 | 7.00  | 15.10 | 6.13  | 0.10 | chr3R | 9048673  | 9085239  |  |  |  |  |
| 1640729 s at | nrv3             | 20.93 | 6.37E-10 | 9.40  | 11.30 | 4.77  | 0.00 | chr2L | 21380000 | 21393319 |  |  |  |  |
| 1625951 at   | CG17778          | 21.59 | 1.93E-13 | 18.40 | 9.60  | 3.71  | 0.10 | chrX  | 388933   | 390402   |  |  |  |  |
| 1634016 at   | CG2781           | 22.52 | 9.84E-05 | 0.00  | 0.00  | 0.05  | 0.30 | chr3R | 3807539  | 3821574  |  |  |  |  |
| 1640774 a at | Mob2             | 40.93 | 2.99E-17 | 8.70  | 10.20 | 3.39  | 0.00 | chr3L | 11515857 | 11555333 |  |  |  |  |
| 1638016 at   | CG2993           | 41.30 | 1.44E-20 | 20.00 | 11.00 | 4.54  | 0.80 | chr3R | 3630387  | 3635736  |  |  |  |  |
| 1624833 a at | mAcR-60C         | 47.66 | 6.00E-19 | 40.40 | 24.70 | 13.46 | 0.10 | chr2R | 20266159 | 20277235 |  |  |  |  |
| 1634855 s at | CG9813           | 52.38 | 1.66E-18 | 14.40 | 13.90 | 1.52  | 0.00 | chr3R | 9198826  | 9205497  |  |  |  |  |
| 1633582 at   | Ih               | 2.03  | 4.56E-06 | 12.80 | 14.10 | 3.56  | 0.40 | chr2R | 10163809 | 10187349 |  |  |  |  |
| 1640976 at   | Ykt6             | 2.08  | 3.58E-04 | 2.50  | 3.00  | 3.30  | 1.30 | chrX  | 7814442  | 7815999  |  |  |  |  |
| 1637853 a at | Hk               | 6.74  | 6.45E-13 | 28.30 | 34.10 | 2.55  | 0.20 | chrX  | 10128791 | 10157518 |  |  |  |  |
| 1641390 at   | dpr19            | 6.95  | 5.70E-14 | 28.70 | 26.30 | 16.21 | 0.10 | chr2L | 10376168 | 10379907 |  |  |  |  |
| 1625911 at   | CG15760          | 7.55  | 2.23E-06 | 10.40 | 6.50  | 2.75  | 0.20 | chrX  | 13563732 | 13570265 |  |  |  |  |
| 1635398 at   | Sep2             | 15.21 | 1.39E-05 | 7.40  | 15.80 | 0.73  | 0.00 | chr3R | 12400265 | 12409385 |  |  |  |  |
| 1639743 s at | Svn2             | 23.07 | 5.56E-17 | 14.70 | 18.10 | 3.24  | 0.10 | chr2R | 12439765 | 12445991 |  |  |  |  |
| 1626200 s at | tipE             | 79.25 | 3.20E-19 | 15.00 | 22.00 | 8.54  | 0.20 | chr3L | 4188499  | 4193788  |  |  |  |  |
| 1624098 s at | CG18675 / tipE   | 110.7 | 1.29E-21 | 3.40  | 4.10  | 0.85  | 0.00 | chr3L | 4173884  | 4192968  |  |  |  |  |
| 1631038 at   | CG32773          | 3.39  | 1.48E-06 | 0.20  | 0.30  | 0.38  | 2.40 | chrX  | 4281829  | 4505418  |  |  |  |  |
| 1638280 at   | CG43102          | 2.79  | 7.52E-05 | 8.40  | 2.70  | 2.22  | 0.30 | chr3R | 13594157 | 13620296 |  |  |  |  |



|              |            |       |          |       |       |       |      |       |          |          |  |  |  |  |
|--------------|------------|-------|----------|-------|-------|-------|------|-------|----------|----------|--|--|--|--|
| 1625065 s at | SK         | 3.16  | 1.71E-04 | 20.60 | 19.90 | 6.76  | 0.10 | chrX  | 5234269  | 5298760  |  |  |  |  |
| 1628666 at   | CG3328     | 3.68  | 5.50E-09 | 5.40  | 6.80  | 1.85  | 0.10 | chr2R | 20050013 | 20061139 |  |  |  |  |
| 1637820 at   | X11Lbeta   | 3.91  | 2.86E-05 | 27.70 | 21.30 | 16.40 | 0.20 | chrX  | 10521770 | 10604900 |  |  |  |  |
| 1630285 at   | RhoGAP100F | 4.75  | 5.13E-05 | 51.90 | 36.10 | 42.99 | 0.20 | chr3R | 27638331 | 27670966 |  |  |  |  |
| 1631417 s at | CG6282     | 5.38  | 1.06E-07 | 20.80 | 17.80 | 5.02  | 0.10 | chr3L | 8597757  | 8610174  |  |  |  |  |
| 1631327 at   | mspo       | 6.52  | 9.62E-10 | 21.90 | 14.60 | 10.31 | 0.10 | chr2R | 10559458 | 10601127 |  |  |  |  |
| 1624143 a at | CG12071    | 7.22  | 9.56E-07 | 27.20 | 17.20 | 18.65 | 0.10 | chr3R | 26702806 | 26706597 |  |  |  |  |
| 1626537 at   | CG17321    | 12.40 | 8.17E-15 | 25.20 | 16.40 | 12.33 | 0.10 | chr2L | 18845184 | 18855118 |  |  |  |  |
| 1639237 at   | CG32814    | 13.59 | 1.27E-15 | 0.60  | 2.00  | 0.86  | 1.90 | chrX  | 913828   | 920733   |  |  |  |  |
| 1628147 at   | neuroligin | 15.87 | 4.20E-15 | 37.40 | 27.00 | 15.91 | 0.20 | chr2L | 6874900  | 6906658  |  |  |  |  |
| 1637913 at   | CG11638    | 17.19 | 3.28E-11 | 20.90 | 29.20 | 11.63 | 0.30 | chrX  | 908017   | 920736   |  |  |  |  |
| 1629228 at   | Hs3st-A    | 18.96 | 1.47E-14 | 21.50 | 15.10 | 3.93  | 0.00 | chr2R | 14605634 | 14642026 |  |  |  |  |
| 1637150 at   | CG13928    | 55.98 | 3.88E-20 | 21.40 | 24.40 | 20.50 | 0.00 | chr3L | 1625791  | 1628377  |  |  |  |  |
| 1639837 at   | Rph        | 171.4 | 5.11E-18 | 28.00 | 13.90 | 16.82 | 0.20 | chrX  | 10643108 | 10651699 |  |  |  |  |
| 1633533 at   | CG6329     | 2.36  | 1.88E-04 | 15.30 | 20.80 | 10.20 | 0.00 | chr2R | 9713880  | 9720419  |  |  |  |  |
| 1625249 at   | fend       | 2.59  | 3.25E-04 | 6.80  | 7.70  | 2.78  | 2.80 | chrX  | 9016006  | 9029073  |  |  |  |  |
| 1632313 at   | CG1998     | 2.61  | 5.43E-07 | 7.80  | 9.20  | 2.70  | 0.20 | chrX  | 13303402 | 13307107 |  |  |  |  |
| 1626675 at   | XRCC1      | 2.78  | 4.40E-05 | 0.60  | 0.50  | 1.41  | 2.40 | chrX  | 5223944  | 5226468  |  |  |  |  |
| 1638225 a at | inx7       | 2.85  | 3.16E-05 | 0.20  | 0.10  | 0.04  | 0.20 | chrX  | 6885645  | 6903902  |  |  |  |  |
| 1636846 at   | lap        | 3.11  | 1.08E-08 | 25.60 | 26.30 | 12.59 | 0.10 | chr3R | 3012716  | 3026663  |  |  |  |  |
| 1634794 at   | CG10924    | 3.22  | 1.74E-05 | 0.00  | 0.00  | 0.03  | 0.00 | chr2R | 14414937 | 14423263 |  |  |  |  |
| 1625840 at   | CG12001    | 4.44  | 1.73E-05 | 1.50  | 1.70  | 0.75  | 1.10 | chr3R | 480522   | 483707   |  |  |  |  |
| 1627835 a at | Cda5       | 4.80  | 3.05E-05 | 4.10  | 4.00  | 1.92  | 0.30 | chr2L | 25402    | 65404    |  |  |  |  |
| 1635196 at   | CG6836     | 4.89  | 1.51E-07 | 3.00  | 1.00  | 0.06  | 0.30 | chr3L | 18943729 | 18948506 |  |  |  |  |
| 1641146 at   | st         | 5.10  | 1.71E-13 | 0.10  | 0.00  | 0.07  | 0.00 | chr3L | 16490751 | 16493562 |  |  |  |  |
| 1623166 at   | CG6071     | 6.64  | 3.19E-07 | 0.20  | 0.30  | 0.32  | 0.10 | chr3L | 11636006 | 11639133 |  |  |  |  |
| 1625621 s at | f          | 23.72 | 6.08E-15 | 0.60  | 0.70  | 1.56  | 0.80 | chrX  | 17126975 | 17174997 |  |  |  |  |
| 1641460 at   | CanB       | 100.8 | 6.77E-22 | 19.70 | 20.50 | 12.30 | 0.00 | chrX  | 5226532  | 5228482  |  |  |  |  |
| 1638334 at   | CG13168    | 3.75  | 9.08E-07 | 0.20  | 0.10  | 0.06  | 0.00 | chr2R | 8141497  | 8143197  |  |  |  |  |
| 1637105 at   | rgr        | 2.72  | 1.45E-04 | 2.50  | 1.20  | 4.31  | 0.90 | chr2R | 4487938  | 4498743  |  |  |  |  |
| 1629667 at   | CG14298    | 3.52  | 3.90E-05 | 0.20  | 0.00  | 0.26  | 0.10 | chr3R | 14701250 | 14702926 |  |  |  |  |
| 1634134 at   | sff        | 4.61  | 8.28E-09 | 37.00 | 40.00 | 30.06 | 0.30 | chr3L | 15893256 | 15917961 |  |  |  |  |
| 1634093 at   | CG32017    | 39.26 | 5.03E-15 | 20.20 | 19.80 | 10.81 | 0.00 | chr4  | 1158456  | 1167155  |  |  |  |  |
| 1638654 at   | CG14645    | 2.00  | 2.14E-04 | 0.00  | 0.00  | 0.00  | 0.00 | chr3R | 160820   | 161228   |  |  |  |  |
| 1634742 at   | Sodh-2     | 2.05  | 5.66E-05 | 1.80  | 2.90  | 0.65  | 1.10 | chr3R | 6702106  | 6703979  |  |  |  |  |
| 1637610 at   | Chrac-16   | 2.06  | 5.92E-05 | 0.30  | 0.20  | 2.04  | 2.30 | chrX  | 11911307 | 11911989 |  |  |  |  |
| 1634736 at   | hts        | 2.07  | 4.10E-13 | 0.00  | 0.00  | 0.01  | 2.70 | chr2R | 15284537 | 15312454 |  |  |  |  |
| 1634113 at   | gk         | 2.07  | 2.36E-05 | 0.10  | 0.10  | 0.08  | 0.20 | chr3L | 18132502 | 18138518 |  |  |  |  |
| 1625652 s at | CG12428    | 2.11  | 4.94E-10 | 0.40  | 0.40  | 0.49  | 1.00 | chr3R | 23529101 | 23532468 |  |  |  |  |
| 1637517 s at | KrT95D     | 2.13  | 2.18E-05 | 1.10  | 1.00  | 0.48  | 0.90 | chr3R | 19824162 | 19857532 |  |  |  |  |
| 1625083 at   | rhi        | 2.13  | 8.24E-06 | 0.00  | 0.00  | 0.05  | 2.70 | chr2R | 13515994 | 13521018 |  |  |  |  |
| 1634145 s at | CG14968    | 2.15  | 2.30E-04 | 0.20  | 0.20  | 0.52  | 0.10 | chr3L | 3299336  | 3303112  |  |  |  |  |
| 1623566 at   | CG13957    | 2.19  | 1.25E-06 | 1.20  | 1.20  | 1.87  | 1.70 | chrX  | 16207742 | 16211783 |  |  |  |  |
| 1624995 at   | CG12355    | 2.23  | 2.40E-09 | 5.70  | 9.80  | 1.40  | 0.20 | chr3L | 15486064 | 15488649 |  |  |  |  |
| 1634630 at   | CG5707     | 2.28  | 1.23E-05 | 0.20  | 0.20  | 0.16  | 0.90 | chr3L | 2189160  | 2192221  |  |  |  |  |
| 1627302 at   | Fmo-2      | 2.37  | 1.71E-05 | 0.10  | 0.20  | 0.07  | 0.20 | chr2R | 2529923  | 2532603  |  |  |  |  |
| 1630038 at   | pyd3       | 2.41  | 2.35E-12 | 1.50  | 2.20  | 0.97  | 0.50 | chr3R | 3573635  | 3575798  |  |  |  |  |
| 1625945 a at | CG1233     | 2.41  | 1.81E-04 | 1.00  | 0.70  | 0.96  | 1.80 | chr3L | 361472   | 365681   |  |  |  |  |
| 1640344 at   | CG18480    | 2.42  | 3.43E-04 | 0.00  | 0.10  | 0.07  | 0.10 | chr2L | 15630084 | 15632618 |  |  |  |  |
| 1635807 at   | CG17739    | 2.42  | 2.35E-05 | 2.20  | 4.20  | 1.18  | 0.00 | chr2R | 8194029  | 8197917  |  |  |  |  |
| 1638810 at   | Faa        | 2.45  | 3.88E-04 | 0.30  | 0.50  | 0.35  | 0.10 | chr3L | 4072032  | 4073954  |  |  |  |  |
| 1633946 at   | CG31955    | 2.48  | 3.82E-04 | 0.50  | 0.50  | 0.67  | 0.70 | chr2L | 3712154  | 3712866  |  |  |  |  |
| 1630244 s at | CG31809    | 2.51  | 2.56E-04 | 0.10  | 0.60  | 0.13  | 0.00 | chr2L | 16849018 | 16858714 |  |  |  |  |
| 1624435 at   | Tsp42Ej    | 2.52  | 3.47E-04 | 6.40  | 8.50  | 1.36  | 0.00 | chr2R | 2927641  | 2930267  |  |  |  |  |
| 1639313 at   | CG17650    | 2.53  | 8.30E-06 | 0.20  | 0.20  | 0.18  | 0.20 | chr2L | 1758286  | 1759093  |  |  |  |  |
| 1638199 s at | RhoGAPp190 | 2.58  | 6.96E-07 | 15.70 | 12.40 | 14.46 | 0.50 | chrX  | 17533180 | 17546595 |  |  |  |  |
| 1634019 at   | CG2064     | 2.67  | 7.98E-09 | 0.60  | 0.90  | 0.41  | 0.10 | chr2R | 3553333  | 3554848  |  |  |  |  |

|              |           |       |          |       |       |       |      |       |          |          |  |  |  |  |
|--------------|-----------|-------|----------|-------|-------|-------|------|-------|----------|----------|--|--|--|--|
| 1626384 at   | CG12182   | 2.69  | 2.86E-06 | 2.20  | 1.90  | 3.51  | 1.80 | chr3L | 2596967  | 2599579  |  |  |  |  |
| 1624381 at   | CG17658   | 2.74  | 3.27E-06 | 0.00  | 0.10  | 0.21  | 3.00 | chr2R | 19782601 | 19784520 |  |  |  |  |
| 1640884 at   | CG15784   | 2.75  | 7.85E-05 | 0.10  | 0.10  | 0.21  | 0.10 | chrX  | 5324713  | 5326494  |  |  |  |  |
| 1640489 at   | CG18522   | 2.82  | 8.14E-05 | 0.30  | 0.60  | 0.27  | 0.10 | chr3R | 11357859 | 11363014 |  |  |  |  |
| 1632087 at   | CG9928    | 2.86  | 9.65E-05 | 0.10  | 0.10  | 0.00  | 0.00 | chr2L | 13142494 | 13142903 |  |  |  |  |
| 1623963 at   | CG32115   | 2.91  | 2.08E-04 | 0.40  | 0.30  | 1.03  | 0.00 | chr3L | 12905127 | 12906746 |  |  |  |  |
| 1637821 at   | CG32023   | 2.92  | 1.67E-04 | 0.00  | 0.10  | 0.05  | 0.10 | chr3L | 8796702  | 8797282  |  |  |  |  |
| 1627854 at   | CG9914    | 2.96  | 1.71E-08 | 0.10  | 0.10  | 0.27  | 0.20 | chrX  | 16200945 | 16202426 |  |  |  |  |
| 1635020 s at | phr6-4    | 3.07  | 9.51E-05 | 0.20  | 0.40  | 0.94  | 1.20 | chr2L | 20643351 | 20645791 |  |  |  |  |
| 1634351 at   | CG7860    | 3.07  | 1.86E-06 | 0.50  | 0.30  | 1.43  | 0.60 | chrX  | 15463026 | 15464474 |  |  |  |  |
| 1639712 at   | CG17261   | 3.19  | 2.95E-07 | 0.00  | 0.00  | 0.03  | 0.00 | chr2L | 3042551  | 3043593  |  |  |  |  |
| 1623903 at   | CG18473   | 3.20  | 6.45E-05 | 0.10  | 0.10  | 0.20  | 0.00 | chr3R | 5189027  | 5190560  |  |  |  |  |
| 1637476 at   | CG15579   | 3.22  | 1.47E-05 | 0.40  | 0.40  | 0.47  | 0.10 | chrX  | 4205397  | 4205832  |  |  |  |  |
| 1634195 at   | CORL      | 3.24  | 1.86E-05 | 5.40  | 3.20  | 7.80  | 1.90 | chr4  | 982967   | 999048   |  |  |  |  |
| 1630147 at   | Hex-C     | 3.28  | 3.07E-04 | 0.10  | 0.30  | 0.01  | 0.00 | chr2R | 11106342 | 11107917 |  |  |  |  |
| 1635376 at   | CG9086    | 3.33  | 2.78E-07 | 1.70  | 1.00  | 0.86  | 2.40 | chrX  | 16850978 | 16862682 |  |  |  |  |
| 1623281 s at | His2B     | 3.38  | 1.01E-05 | 0.10  | 0.10  | 0.44  | 2.30 | n/a   |          |          |  |  |  |  |
| 1633949 at   | CG15152   | 3.47  | 5.89E-06 | 0.00  | 0.00  | 0.03  | 0.00 | chr2L | 18114547 | 18115220 |  |  |  |  |
| 1627188 at   | phm       | 3.49  | 3.20E-04 | 0.10  | 0.20  | 2.53  | 0.70 | chrX  | 18579802 | 18582257 |  |  |  |  |
| 1629418 s at | sei       | 3.53  | 1.67E-07 | 9.90  | 10.20 | 3.14  | 1.30 | chr2R | 19936728 | 19940560 |  |  |  |  |
| 1640488 a at | CG9510    | 3.57  | 2.24E-10 | 0.10  | 0.10  | 0.05  | 0.00 | chr2L | 8939780  | 8943264  |  |  |  |  |
| 1628701 a at | CG14798   | 3.58  | 3.71E-05 | 1.50  | 2.00  | 1.56  | 1.50 | chrX  | 1586857  | 1587876  |  |  |  |  |
| 1635370 at   | Tsp42E1   | 3.59  | 1.44E-08 | 0.20  | 0.40  | 0.90  | 0.10 | chr2R | 2933274  | 2936043  |  |  |  |  |
| 1623126 at   | CG13912   | 3.60  | 9.35E-09 | 0.10  | 0.20  | 0.02  | 0.20 | chr3L | 1189590  | 1190472  |  |  |  |  |
| 1631072 at   | CG9512    | 3.64  | 3.79E-05 | 0.80  | 0.20  | 0.06  | 0.00 | chrX  | 14795985 | 14799574 |  |  |  |  |
| 1628690 at   | CG1503    | 3.74  | 1.66E-06 | 0.20  | 0.30  | 0.23  | 0.80 | chrX  | 20975890 | 20977394 |  |  |  |  |
| 1632100 s at | sina      | 3.82  | 4.29E-09 | 3.10  | 3.60  | 5.12  | 1.00 | chr3L | 16846851 | 16851812 |  |  |  |  |
| 1634959 at   | TPIIA-S-2 | 3.90  | 2.55E-09 | 0.20  | 0.30  | 0.39  | 0.20 | chrX  | 905134   | 905676   |  |  |  |  |
| 1630696 at   | ebd2      | 3.93  | 1.02E-07 | 0.90  | 0.30  | 1.08  | 2.20 | chr3L | 21337868 | 21342388 |  |  |  |  |
| 1624862 at   | CG43117   | 3.98  | 2.54E-04 | 2.30  | 2.90  | 4.34  | 0.70 | chr3R | 22280516 | 22280834 |  |  |  |  |
| 1625046 at   | Rbm13     | 3.99  | 5.79E-07 | 0.30  | 0.30  | 1.08  | 2.10 | chrX  | 8795724  | 8797497  |  |  |  |  |
| 1623609 at   | CG15172   | 4.17  | 1.17E-07 | 0.00  | 0.00  | 0.03  | 0.00 | chr2L | 19022417 | 19023646 |  |  |  |  |
| 1632775 at   | CG42254   | 4.20  | 4.97E-06 | 1.30  | 0.90  | 0.82  | 1.10 | chr2R | 10657104 | 10658804 |  |  |  |  |
| 1629434 at   | CG9380    | 4.29  | 1.94E-04 | 0.00  | 0.00  | 0.02  | 0.00 | chr2R | 21071151 | 21142841 |  |  |  |  |
| 1627096 s at | CG16778   | 4.35  | 7.80E-05 | 22.20 | 13.80 | 32.35 | 0.40 | chr2R | 20973303 | 20986711 |  |  |  |  |
| 1627862 at   | dao       | 4.38  | 1.09E-07 | 8.20  | 11.40 | 3.14  | 1.60 | chr2L | 15248879 | 15254715 |  |  |  |  |
| 1628696 at   | CG12643   | 4.47  | 8.14E-07 | 0.40  | 0.50  | 12.22 | 0.20 | chrX  | 10158266 | 10159296 |  |  |  |  |
| 1628611 at   | CG11241   | 4.48  | 1.16E-04 | 1.20  | 0.70  | 0.32  | 1.00 | chr3L | 22726252 | 22731520 |  |  |  |  |
| 1629853 at   | CG3699    | 4.49  | 5.39E-08 | 0.00  | 0.10  | 0.00  | 0.00 | chrX  | 840687   | 841517   |  |  |  |  |
| 1627613 at   | Mtk       | 4.65  | 6.02E-05 | 0.30  | 0.10  | 0.01  | 0.00 | chr2R | 11296351 | 11296618 |  |  |  |  |
| 1637146 at   | CG42694   | 4.70  | 3.97E-10 | 0.50  | 0.60  | 0.69  | 1.70 | chr2R | 18829772 | 18832670 |  |  |  |  |
| 1630600 at   | Fst / Scm | 5.04  | 5.44E-05 | 0.00  | 0.10  | 0.04  | 0.00 | chr3R | 5459081  | 5471872  |  |  |  |  |
| 1630829 at   | PIP5K59B  | 5.20  | 5.23E-11 | 31.90 | 27.20 | 11.49 | 0.30 | chr2R | 18762294 | 18768959 |  |  |  |  |
| 1633599 a at | Pepck     | 5.32  | 1.82E-09 | 0.00  | 0.10  | 0.04  | 0.00 | chr2R | 14424272 | 14426924 |  |  |  |  |
| 1637275 a at | CG42807   | 5.37  | 1.21E-04 | 0.10  | 0.00  | 0.01  | 0.00 | chr2R | 9459029  | 9460045  |  |  |  |  |
| 1630334 at   | CG15406   | 5.42  | 4.67E-05 | 0.00  | 0.00  | 0.02  | 0.00 | chr2L | 3309222  | 3311682  |  |  |  |  |
| 1637282 at   | CG6171    | 5.93  | 1.36E-04 | 1.30  | 1.40  | 1.04  | 2.10 | chr3R | 11188518 | 11189579 |  |  |  |  |
| 1635321 at   | CG14688   | 6.18  | 1.21E-06 | 1.10  | 1.80  | 0.20  | 0.80 | chr3R | 6503459  | 6506647  |  |  |  |  |
| 1633401 s at | Cyp12d1   | 6.28  | 2.71E-08 | 0.10  | 0.10  | 0.01  | 1.10 | chr2R | 7011163  | 7013152  |  |  |  |  |
| 1632677 a at | GM130     | 6.28  | 2.95E-04 | 1.20  | 1.50  | 0.90  | 1.70 | chr2R | 18012072 | 18015002 |  |  |  |  |
| 1625644 at   | CG2641    | 6.50  | 4.86E-05 | 0.60  | 1.50  | 1.18  | 1.40 | chr3R | 3619931  | 3622321  |  |  |  |  |
| 1629473 at   | edi       | 6.93  | 2.74E-11 | 4.80  | 4.40  | 6.52  | 0.10 | chr3R | 14870604 | 14920076 |  |  |  |  |
| 1636431 at   | CG8768    | 7.23  | 3.83E-04 | 2.40  | 3.00  | 0.51  | 0.30 | chr2R | 8578813  | 8580193  |  |  |  |  |
| 1641722 at   | Reg-2     | 8.03  | 5.18E-10 | 0.10  | 0.10  | 0.03  | 0.20 | chr3L | 605165   | 606569   |  |  |  |  |
| 1634064 at   | CG13311   | 8.13  | 6.33E-05 | 0.00  | 0.00  | 0.03  | 0.00 | chr3L | 8794640  | 8795264  |  |  |  |  |
| 1634514 at   | CG33258   | 8.42  | 2.84E-04 | 0.00  | 0.00  | 0.01  | 0.00 | chr3L | 16075651 | 16076738 |  |  |  |  |
| 1627741 at   | CG13086   | 10.09 | 5.30E-14 | 0.10  | 0.00  | 0.01  | 0.00 | chr2L | 19364375 | 19365470 |  |  |  |  |

|              |               |       |          |       |       |       |      |       |          |          |  |  |  |
|--------------|---------------|-------|----------|-------|-------|-------|------|-------|----------|----------|--|--|--|
| 1624377 s at | be            | 10.15 | 3.53E-13 | 3.20  | 2.80  | 7.49  | 0.70 | chrX  | 14918467 | 14936093 |  |  |  |
| 1639118 a at | Hrb87F        | 11.58 | 1.85E-04 | 0.80  | 0.90  | 3.18  | 2.10 | chr3R | 9482568  | 9486253  |  |  |  |
| 1624505 at   | Lip4          | 11.66 | 4.22E-05 | 0.20  | 0.20  | 1.00  | 0.30 | chr2L | 10527572 | 10531777 |  |  |  |
| 1630085 s at | Peritrophin-A | 12.21 | 3.92E-16 | 0.20  | 0.30  | 0.96  | 0.70 | chrX  | 20115727 | 20119277 |  |  |  |
| 1623491 at   | CG15155       | 12.72 | 2.92E-05 | 0.00  | 0.00  | 0.02  | 0.00 | chr2L | 18154864 | 18155942 |  |  |  |
| 1637224 at   | CG13905       | 13.12 | 1.01E-06 | 0.00  | 0.20  | 0.32  | 0.10 | chr3L | 902898   | 903810   |  |  |  |
| 1640881 at   | CG16762       | 15.67 | 7.02E-06 | 0.00  | 0.00  | 0.01  | 0.00 | chr3L | 2474667  | 2475614  |  |  |  |
| 1633959 s at | CG30345       | 17.43 | 3.26E-10 | 0.60  | 0.30  | 0.17  | 0.00 | chr2R | 5036190  | 5039397  |  |  |  |
| 1626098 at   | CG11453       | 17.72 | 1.51E-09 | 0.10  | 0.10  | 0.14  | 0.20 | chr3R | 15609244 | 15611241 |  |  |  |
| 1629125 at   | gp210         | 18.75 | 2.67E-14 | 1.30  | 1.70  | 19.34 | 1.10 | chr2R | 1648367  | 1661829  |  |  |  |
| 1637691 at   | CG4570        | 19.71 | 2.42E-04 | 0.00  | 0.00  | 1.17  | 2.30 | chr3R | 6682529  | 6683788  |  |  |  |
| 1635306 at   | CG4650        | 24.84 | 2.08E-08 | 1.10  | 1.00  | 2.00  | 0.80 | chr2L | 14773812 | 14774981 |  |  |  |
| 1628052 at   | Cyp6a17       | 25.61 | 1.13E-14 | 2.10  | 1.40  | 0.14  | 0.10 | chr2R | 10761459 | 10763063 |  |  |  |
| 1627736 at   | Actbeta       | 26.91 | 1.46E-18 | 13.80 | 17.50 | 11.40 | 0.10 | chr4  | 1097957  | 1105422  |  |  |  |
| 1627551 s at | AttA / AttB   | 27.02 | 3.80E-08 | 0.20  | 0.00  | 0.02  | 0.50 | chr2R | 10636728 | 10637670 |  |  |  |
| 1625436 at   | Uro           | 27.90 | 3.97E-06 | 0.00  | 0.00  | 0.03  | 0.00 | chr2L | 7780085  | 7781415  |  |  |  |
| 1625124 at   | AttA          | 39.24 | 4.01E-09 | 0.50  | 0.20  | 0.08  | 0.60 | chr2R | 10634876 | 10635698 |  |  |  |
| 1625246 at   | Her           | 52.93 | 9.94E-11 | 0.10  | 0.10  | 0.03  | 1.20 | chrX  | 18098436 | 18099177 |  |  |  |
| 1623477 at   | CG42857       | 73.28 | 4.41E-15 | 0.10  | 0.10  | 0.02  | 0.50 | chr3R | 5646236  | 5646913  |  |  |  |

**Table S4. Tissue-specific expression of Su(Hw) target genes using anatomical expression data (FlyAtlas)**

|                        | FlyAtlas    |    | Su(Hw) target genes |    |          |                  |    |          |
|------------------------|-------------|----|---------------------|----|----------|------------------|----|----------|
|                        | (n=12856)   |    | Repressed (n=75)    |    |          | Activated (n=30) |    |          |
|                        | #           | %  | #                   | %  | <i>P</i> | #                | %  | <i>P</i> |
| <b>CNS</b>             | <b>3654</b> | 28 | <b>56</b>           | 75 | 5.3E-19  | <b>12</b>        | 40 | 0.159    |
| <b>Ovary</b>           | <b>2070</b> | 16 | <b>4</b>            | 5  | 0.011    | <b>3</b>         | 10 | 0.363    |
| <b>Ovary &amp; CNS</b> | <b>703</b>  | 5  | <b>2</b>            | 3  | 0.289    | <b>0</b>         | 0  | 0.187    |
| <b>Testis</b>          | <b>2778</b> | 22 | <b>6</b>            | 8  | 0.004    | <b>3</b>         | 10 | 0.124    |
| <b>Hindgut</b>         | <b>1890</b> | 15 | <b>14</b>           | 19 | 0.332    | <b>12</b>        | 40 | 4.8E-05  |
| <b>Tubule</b>          | <b>1788</b> | 14 | <b>10</b>           | 13 | 0.889    | <b>5</b>         | 17 | 0.660    |
| <b>Salivary gland</b>  | <b>2853</b> | 22 | <b>11</b>           | 15 | 0.119    | <b>8</b>         | 27 | 0.555    |
| <b>Fat body</b>        | <b>1925</b> | 15 | <b>9</b>            | 12 | 0.472    | <b>2</b>         | 7  | 0.204    |
| <b>Midgut</b>          | <b>1946</b> | 15 | <b>6</b>            | 8  | 0.085    | <b>5</b>         | 17 | 0.810    |
